# Supplementary material for: Atrial fibrillation is linked to increased left ventricular fibrosis and inflammation measured by CMR with prognostic implications
Source: Research Square preprint supplement (doi:10.21203/rs.3.rs-7584111/v1), 2025-11-05
Supplement: Supplementary file 1 [file 8fed85934a4bcbbb6494d1dd.pdf]

# left ventricular fibrosis and inflammation measured by cardiac magnetic resonance tissue characterization in atrial fibrillation and its prognostic implication

## background

AF might affect LV remodeling

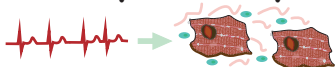

## aim

assessment of fibrosis and inflammation by CMR tissue characterization T1- and T2-mapping in AF and no AF

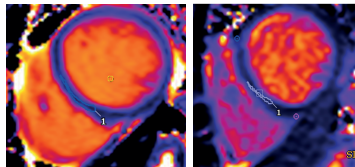

## results

CMR and 1-year follow-up n = 2879

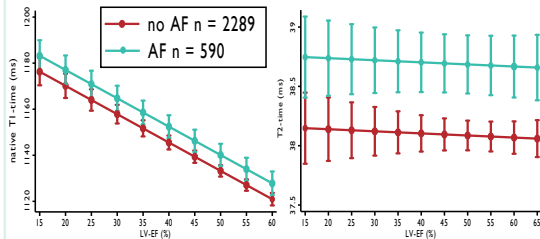

T1 and T2 values are higher in AF corrected for functional and morphological parameters

## prognosis

primary endpoint all-cause mortality and hospitalization for heart failure n = 85

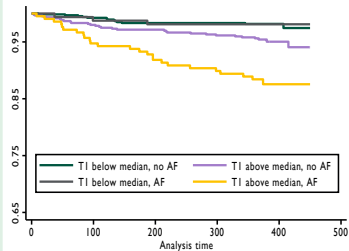

T1 is an independent prognosticator

## conclusion

- AF is associated with higher T1 and T2 mapping, suggesting a potential link to LV fibrosis and inflammation
- T1 mapping provides relevant prognostic information beyond ejection fraction and the presence of AF
